# Supplementary material for: A series of new E. coli–Thermococcus shuttle vectors compatible with previously existing vectors
Source: PubMed Central journal article supplement (PMC5988781; doi:10.1007/s00792-018-1019-6), 2018-03-01
Supplement: 792_2018_1019_MOESM4_ESM.pdf [file 792_2018_1019_MOESM4_ESM.pdf]

```

NC_021208      841 GCGTCCGGAAAAAGCGCGTGCAATACAGCTTCTTCGGTGTATAGATAACCCGTGAGGAAG 900
      ||      |      || | | | |      |      |      |      |||
NC_021208      638 GCCAGAGTGGTCTCAGCATCAACTGGCTCCGGTAGCAAGCGGAAGACTGAGTATGCCAAG 697

NC_021208      901 CTTCGTCGGGATATCAACAACTGAGGGATATGGGTCTTGTTCGGTTGAAAACTCGAT 960
      |||
NC_021208      698 CTTCGTCGGGATATCAACAACTGAGGGATATGGGTCTTGTTCGGTTGAAAACTCGAT 757

NC_021208      961 GGCTTCTCTGGGTGTCTCCTACTCCCAAGGCTCTTTACTTGATTGAACATAGGAGAAAT 1020
      |||
NC_021208      758 GGCTTCTCTGGGTGTCTCCTACTCCCATGGCTCTTTACTTGATTGAACATAGGAGAAAT 817

NC_021208     1021 TCAAATCGTGTCCGTAGGTCGATGCGTCCGGAAAAAGCGCGTGCAATACAGCTTCTTCGG 1080
      |||
NC_021208      818 TCAAATCGTGTCCGTAGGTCGATGCGTCCGGAAAAAGCGCGTGCAATACAGCTTCTTCGG 877

NC_021208     1081 TGTATAGATATCCCGGCTATTTTGTGGTTCGAAAGATGGCAAGAACAAGGTTGCTGAG 1140
      |||
NC_021208      878 TGTATAGATAACCCGTGAGGAAGCTTCGTCGGGATATCAACAACTGAGGGATATGGGTC 937

```

**Supplementary Figure 1:** Alignment of pTP2 sequence (NC\_021208) with itself, showing the presence of a tandem repeat from nucleotide 898-1090 (695-887).
