# Supplementary material for: A series of new E. coli–Thermococcus shuttle vectors compatible with previously existing vectors
Source: PubMed Central journal article supplement (PMC5988781; doi:10.1007/s00792-018-1019-6), 2018-03-01
Supplement: 792_2018_1019_MOESM5_ESM.pdf [file 792_2018_1019_MOESM5_ESM.pdf]

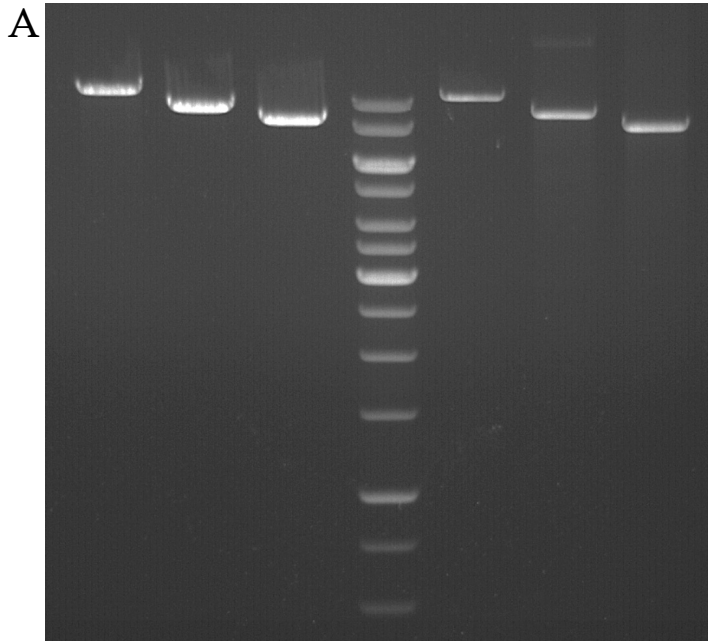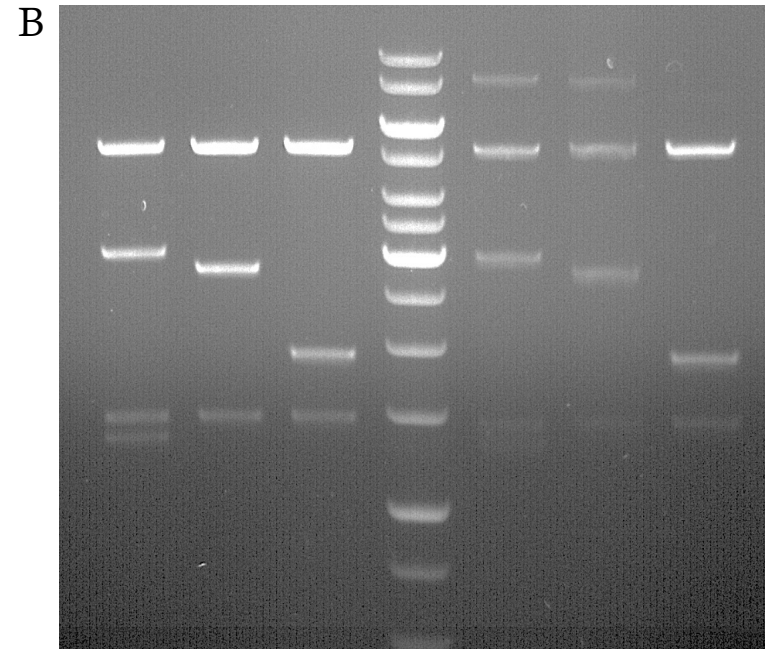

**Digestion and gel electrophoresis of pLC70-derived plasmids.**

(A) Plasmids digested with *RruI*, recognising a single site on each plasmid.

- Lane 1: pLC70 isolated from *E. coli*
- Lane 2: pTNTrpE isolated from *E. coli*
- Lane 3: pTNAg isolated from *E. coli*
- Lane 4: GeneRuler 1kb DNA Ladder
- Lane 5: pLC70 isolated from *T. kodakarensis*
- Lane 6: pTNTrpE isolated from *T. kodakarensis*
- Lane 7: pTNAg isolated from *T. kodakarensis*

**Digestion and gel electrophoresis of pLC70-derived plasmids.**

(B) Plasmids digested with *PstI*, recognising multiple sites on each plasmid.

- Lane 1: pLC70 isolated from *E. coli*
- Lane 2: pTNTrpE isolated from *E. coli*
- Lane 3: pTNAg isolated from *E. coli*
- Lane 4: GeneRuler 1kb DNA Ladder
- Lane 5: pLC70 isolated from *T. kodakarensis*
- Lane 6: pTNTrpE isolated from *T. kodakarensis*
- Lane 7: pTNAg isolated from *T. kodakarensis*

*Note that partially digested plasmid forms an additional, high molecular weight band in *T. kodakarensis* preparations.*
